# 1 Protein yield is tunable by synonymous codon changes of translation initiation sites

2

3 Bikash K. Bhandari<sup>1,†</sup>, Chun Shen Lim<sup>1,†</sup>, Daniela M. Remus<sup>3</sup>, Augustine Chen<sup>1</sup>, Craig van  
4 Dolleweerd<sup>3</sup>, Paul P. Gardner<sup>1,2,\*</sup>

5

6 <sup>1</sup>Department of Biochemistry, School of Biomedical Sciences, University of Otago, Dunedin,  
7 New Zealand

8 <sup>2</sup>Biomolecular Interaction Centre, University of Canterbury, Christchurch, New Zealand

9 <sup>3</sup>Callaghan Innovation Protein Science and Engineering, University of Canterbury, Christchurch,  
10 New Zealand

11

12 <sup>†</sup>These authors contributed equally.

13 <sup>\*</sup>Corresponding author. Email: [paul.gardner@otago.ac.nz](mailto:paul.gardner@otago.ac.nz)

14

15 Short Title: Tunable recombinant protein expression

16

## 17 ABSTRACT

18 Recombinant protein production is a key process in generating proteins of interest in the  
19 pharmaceutical industry and biomedical research. However, about 50% of recombinant proteins  
20 fail to be expressed in a variety of host cells. To address this problem, we modified up to the first  
21 nine codons of messenger RNAs with synonymous substitutions and showed that protein levels  
22 can be tuned. These modifications alter the ‘accessibility’ of translation initiation sites. We also  
23 reveal the dynamics between accessibility, gene expression, and turnovers using a  
24 coarse-grained simulation.

25

26

## 27 INTRODUCTION

28 Recombinant protein expression has numerous applications in biotechnology and biomedical  
29 research. Despite extensive refinements in protocols over the past three decades, half of the  
30 experiments fail in the expression phase (<http://targetdb.rcsb.org/metrics/>). Notable problems  
31 are the low expression of ‘difficult-to-express’ proteins such as those found in, or associated  
32 with, membranes, and the poor growth of the expression hosts, which may relate to toxicity of  
33 heterologous proteins (Kimelman et al., 2012) (see (Berlec and Strukelj, 2013; Rosano and  
34 Ceccarelli, 2014) for detailed reviews). Despite these issues, mRNA abundance can only  
35 explain up to 40% of the variation in protein abundance, due to the complexity of translation and  
36 turnover of biomolecules (Abreu et al., 2009; Bernstein et al., 2002; Hanson and Collier, 2018;  
37 Lim et al., 2018; Schwanhäusser et al., 2011; Stevens and Brown, 2013; Taniguchi et al., 2010).  
38 Furthermore, strong promoters used in expression vectors do not always lead to a desirable  
39 level of protein expression because of leaky expression (Rosano and Ceccarelli, 2014).

40

41 For *Escherichia coli*, mainstream models that may explain the lower-than-expected correlation  
42 between mRNA and protein levels are codon-usage and mRNA structure. Codon analysis is  
43 based on the frequency of codon usage in highly expressed proteins using codon adaptation

44 index (CAI) (Sharp and Li, 1987) or tRNA adaptation index (tAI) (Reis and d. Reis, 2004; Sabi  
45 and Tuller, 2014), whereas mRNA folding analysis predicts the stability of mRNA secondary  
46 structures. Codon usage bias is thought to correlate with tRNA abundance, translation efficiency  
47 and protein production (Brule and Grayhack, 2017; Gutman and Hatfield, 1989; Osterman et al.,  
48 2020; Reis and d. Reis, 2004; Sabi and Tuller, 2014; Sharp and Li, 1987; Verma et al., 2019) but  
49 its usefulness has been questioned (Boël et al., 2016; Cambray et al., 2018; Kudla et al., 2009;  
50 Plotkin and Kudla, 2011). More recent studies show stronger support for models based on  
51 mRNA folding, in which the stability of RNA structures around the Shine-Dalgarno sequence  
52 and translation initiation sites inversely correlates with protein expression (Cambray et al., 2018;  
53 de Smit and van Duin, 1990; Dvir et al., 2013; Kudla et al., 2009; Plotkin and Kudla, 2011; Tuller  
54 and Zur, 2015). We recently proposed a third model in which the avoidance of inappropriate  
55 interactions between mRNAs and non-coding RNAs has a strong effect on protein expression  
56 (Umu et al., 2016). The roles of these models in protein expression is an active area of  
57 research.

58

59 The algorithms for gene optimisation sample synonymous protein-coding sequences using  
60 'fitness' models based on CAI, tAI, mRNA folding, and/or G+C content (%) (Chung and Lee,  
61 2012; Raab et al., 2010; Salis et al., 2009; Terai et al., 2016; Villalobos et al., 2006). However,  
62 these 'fitness' models are usually based on some of the above findings that rely on either  
63 endogenous proteins, reporter proteins, or a few heterologous proteins with their synonymous  
64 variants. It is unclear whether these features are generalisable to explain the expression of all  
65 heterologous proteins. To address this question, we studied multiple large datasets across  
66 species in order to extract features that allow us to predict the outcomes of 11,430 experiments  
67 of recombinant protein expression in *E. coli*. With this information, we propose how such  
68 features can be exploited to fine-tune protein expression at a low cost.

69

## 70 RESULTS

### 71 Accessibility of translation initiation sites strongly correlates with protein abundance

72 To identify a better energetic model for mRNA structure that explains protein expression, we  
73 examined an *E. coli* expression dataset of green fluorescent protein (GFP) fused in-frame with a  
74 library of 96-nt upstream sequences (N=244,000) (Cambray et al., 2018). We removed the  
75 redundancy of these 96-nt upstream sequences by clustering on sequence similarity, giving rise  
76 to 14,425 representative sequences. We calculated the accessibility (also known as 'opening  
77 energy' based on unpairing probability) for all the corresponding sub-sequences (see Methods).  
78 We examined the correlation between the opening energies and GFP levels. We found that the  
79 opening energies of translation initiation sites, in particular from the nucleotide positions -30 to  
80 18 (-30:18), shows the highest correlation with protein abundance (Fig 1A; Spearman's  
81 correlation,  $R_s = -0.65$ ,  $P < 2.2 \times 10^{-16}$ ). This is stronger than the highest correlation between the  
82 minimum free energy -30:30 and protein abundance, which was previously reported as the  
83 highest ranked feature (Fig 1A;  $R_s = 0.51$ ,  $P < 2.2 \times 10^{-16}$ ). To account for multiple-testing, the  
84 P-values were adjusted using Bonferroni's correction and reported to machine precision. The  
85 datasets used and results are summarised in Supplementary Table S1.

86

87 We repeated the analysis for a dataset of yellow fluorescent protein (YFP) expression in  
88 *Saccharomyces cerevisiae* (Dvir et al., 2013). This dataset corresponds to a library of 5'UTR  
89 variants, in which the 10-nt sequences preceding the YFP translation initiation site were  
90 randomly substituted (N=2,041). In this case, the opening energy -7:89 showed a stronger  
91 correlation with protein abundance than that of the minimum free energy -15:50 reported  
92 previously (Fig 1B;  $R_s = -0.55$  versus 0.46).

93

94 To examine the usefulness of accessibility in complex eukaryotes, we analysed a dataset of  
95 GFP expression in *Mus musculus* (Noderer et al., 2014). The reporter library was originally  
96 designed to measure the strength of translation initiation sequence context, in which the 6- and  
97 2-nt sequences upstream and downstream of the GFP translation initiation site were randomly  
98 substituted, respectively (N=65,536). Here the opening energy -8:11 showed a maximum  
99 correlation with expressed proteins, which again, is stronger than that of the minimum free  
100 energy -30:30 (Fig 1C;  $R_s = -0.28$  versus 0.12).

101

102 Taken together, our findings suggest that the accessibility of translation initiation sites strongly  
103 correlates with protein abundance across species. Interestingly, our findings also suggest that  
104 the Shine-Dalgarno sequence (Shine and Dalgarno, 1974) at -13:-8 should be accessible to  
105 recruit ribosomes.

106

### 107 **Accessibility predicts the outcome of recombinant protein expression**

108 We investigated how accessibility performs in the real world in prediction of recombinant protein  
109 expression. For this purpose, we analysed 11,430 expression experiments in *E. coli* from the  
110 'Protein Structure Initiative: Biology' (PSI: Biology) (Acton et al., 2005; Chen et al., 2004; Seiler et  
111 al., 2014). These PSI: Biology targets were expressed using the pET21\_NESG expression  
112 vector that harbours the *T7lac* inducible promoter and a C-terminal His tag (Acton et al., 2005).

113

114 We split the experimental results of the PSI: Biology targets into protein expression 'success' and  
115 'failure' groups (N=8,780 and 2,650, respectively; see Supplementary Fig S2). These  
116 PSI: Biology targets span more than 189 species and the failures are representative of various  
117 problems in heterologous protein expression. Only 1.6% of the targets were *E. coli* proteins,  
118 which is negligible (N=179; see Supplementary Fig S2).

119

120 We calculated the opening energies for all possible sub-sequences of the PSI: Biology targets as  
121 above (Fig 2, positions relative to initiation codons). For each sub-sequence region, we used the  
122 opening energies to predict the expression outcomes and computed the prediction accuracy  
123 using the area under the receiver operating characteristic curve (AUC; see Fig 2C). A closer  
124 look into the correlations between opening energies and expression outcomes, and AUC scores  
125 calculated for the sub-sequence regions reveals a strong accessibility signal of translation  
126 initiation sites (Fig 2B&C, Cambray's GFP and PSI: Biology datasets, respectively). We matched  
127 the correlations and AUC scores by sub-sequence regions and confirmed that sub-sequence  
128 regions that have strong correlations are likely to have high AUC scores (Fig 2D). In contrast,

129 the sub-sequence regions that have zero correlations are not useful for predicting the  
130 expression outcomes (AUC approximately 0.5).

131

132 We then asked how accessibility manifests in the endogenous mRNAs of *E. coli*, for which we  
133 studied a proteomics dataset of 3,725 proteins available from PaxDb (Wang et al., 2015). As  
134 expected, we observed a similar accessibility signal, with the region -25:16 correlated the most  
135 with protein abundance (Fig 2E). However, the correlation was rather low ( $R=-0.17$ ,  
136  $P<2.2\times 10^{-16}$ ), which may reflect the limitation of mass spectrometry to detect lower abundances  
137 (Nilsson et al., 2010; Tabb et al., 2009). Furthermore, the endogenous promoters have variable  
138 strength, which gives rise to a broad range of mRNA and protein levels (Delvigne et al., 2017;  
139 Deuschle et al., 1986). Taken together, our results show that the accessibility signal of  
140 translation initiation sites is very consistent across various datasets analysed (Supplementary  
141 Fig S1 and Fig 2).

142

### 143 **Accessibility outperforms other features in prediction of recombinant protein expression**

144 To choose an accessibility region for subsequent analyses, we selected the top 200 regions  
145 from the above correlation analysis on Cambray's dataset (Fig 2B) and used random forest to  
146 rank their Gini importance scores in prediction of the outcomes of the PSI:Biography targets. The  
147 region -24:24 was ranked first, which is nearly identical to the region -23:24 with the top AUC  
148 score (Fig 2C, AUC=0.70). We therefore used the opening energy at the region -24:24 in  
149 subsequent analyses.

150

151 We asked how the other features perform compared to accessibility in prediction of  
152 heterologous protein expression, for which we analysed the same PSI:Biography dataset. We first  
153 calculated the minimum free energy and avoidance at the regions -30:30 and 1:30, respectively.  
154 These are the local features associated with translation initiation rate. We also calculated CAI  
155 (Sharp and Li, 1987), tAI (Tuller et al., 2010), codon context (CC) (Ang et al., 2016), G+C  
156 content, and Ixnos scores (Tunney et al., 2018). CC is similar to CAI except it takes codon-pairs  
157 into account, whereas the Ixnos scores are translation elongation rates predicted using a neural  
158 network model trained with ribosome profiling data (Supplementary Fig S3). These are the  
159 global features associated with translation elongation rate. We built a random forest model to  
160 rank the Gini importance scores of these local and global features. The local features ranked  
161 higher than the global features (Fig 3A). We then calculated and compared the prediction  
162 accuracy of these features. The AUC scores for the local features were 0.70, 0.67 and 0.62 for  
163 the opening energy, minimum free energy and avoidance, respectively, whereas the global  
164 features were 0.58, 0.57, 0.54, 0.54 and 0.51 for Ixnos, G+C content, CAI, CC and tAI,  
165 respectively (Fig 3B). The local features outperform the global features, suggesting that effects  
166 on translation initiation are a major predictor of the outcome of heterologous protein expression.  
167 We further examined the local G+C contents corresponding to the local features  
168 (Supplementary Fig S4). The G+C contents in the regions -24:24 and -30:30 weakly correlate  
169 with opening energy and minimum free energy, respectively. The AUC scores for these local  
170 G+C contents are also lower than the corresponding local features, suggesting that these local  
171 G+C contents are not good proxies for the corresponding local features. Overall, our findings

172 support previous reports that the effects on translation initiation are rate-limiting (Kudla et al.,  
173 2009; Tuller and Zur, 2015) which, interestingly, correlate with the binary outcome of  
174 recombinant protein expression (Fig 3C). Importantly, accessibility outperformed all other  
175 features.

176

177 To identify a good opening energy threshold, we calculated positive likelihood ratios for different  
178 opening energy thresholds using the cumulative frequencies of true negative, false negative,  
179 true positive and false positive derived from the above receiver operating characteristic (ROC)  
180 analysis (Supplementary Fig S5, top panel). Meanwhile, we calculated the 95% confidence  
181 intervals of these positive likelihood ratios using 10,000 bootstrap replicates. We reasoned that  
182 there is an upper and lower bound on translation initiation rate, therefore the relationship  
183 between translation initiation rate and accessibility is likely to follow a sigmoidal pattern. We fit  
184 the positive likelihood ratios into a four-parametric logistic regression model (Supplementary Fig  
185 S5). As a result, we are 95% confident that an opening energy of 10 kcal/mol or below at the  
186 region -24:24 is about two times more likely to belong to the sequences which are successfully  
187 expressed than those that failed.

188

#### 189 **Accessibility can be improved using a simulated annealing algorithm**

190 The above results suggest that accessibility can, in part, explain the low expression problem of  
191 heterologous protein expression. Therefore, we sought to exploit this idea for optimising gene  
192 expression. We developed a simulated annealing algorithm to maximise the accessibility at the  
193 region -24:24 using synonymous codon substitution (see Methods). Previous studies have  
194 found that full-length synonymous codon-substituted transgenes may produce unexpected  
195 results, such as a reduction in mRNA abundance, RNA toxicity, and/or protein misfolding  
196 (Ben-Yehzekel et al., 2015; Mittal et al., 2018; Tunney et al., 2018; Umu et al., 2016). Therefore,  
197 we sought to determine the minimum number of codons required for synonymous substitutions  
198 in order to achieve near-optimum accessibility. For this purpose, we used the PSI:Biology  
199 targets that failed to be expressed. We applied our simulated annealing algorithm such that  
200 synonymous substitutions can happen at any codon of the sequences except the start and stop  
201 codons, although the changes may not necessarily happen to all codons due to the stochastic  
202 nature of our optimisation algorithm (see Methods). Next, we constrained synonymous codon  
203 substitution to the first 14 codons and applied the same procedure (Supplementary Fig S6A).  
204 Therefore, the changes may only occur at any or all of the first 14 codons. We repeated the  
205 same procedure for the first nine and also the first four codons. Thus a total of four series of  
206 codon-substituted sequences were generated. We then compared the distributions of opening  
207 energy -24:24 for these series using the Kolmogorov-Smirnov statistic ( $D_{KS}$ ; see Supplementary  
208 Fig S6B). The distance between the distributions of the nine and full-length codon-substituted  
209 series was significantly different yet sufficiently close ( $D_{KS}=0.087$ ,  $P=3.3 \times 10^{-8}$ ), suggesting that  
210 optimisation of the first nine codons is sufficient in most cases to achieve an optimum  
211 accessibility of translation initiation sites. We named our software Translation Initiation coding  
212 region designer (Tlsigner), which by default, allows synonymous substitutions in the first nine  
213 codons.

214

215 We asked to what extent the existing gene optimisation tools modify the accessibility of  
216 translation initiation sites. For this purpose, we first submitted the PSI:Biology targets that failed  
217 to be expressed to the ExpOptimizer web server from NovoPro Bioscience (see Methods). We  
218 also optimised the PSI:Biology targets using the standalone version of Codon Optimisation  
219 OnLine (COOL) (Chung and Lee, 2012). We found that both tools increase accessibility  
220 indirectly even though their algorithms are not specifically designed to do so. In fact, a purely  
221 random synonymous codon substitution on these PSI:Biology targets using our own script  
222 resulted in similar increases in accessibility (Supplementary Fig S6C). These results may  
223 explain some indirect benefits from the existing gene optimisation tools (i.e. any change from  
224 suboptimal is likely to be an improvement, see below).

225

### 226 **Low protein yields can be improved by synonymous codon changes in the vicinity of** 227 **translation initiation sites**

228 To demonstrate that heterologous protein expression is tunable with minimum effort, we  
229 designed and tested a series of GFP reporter gene constructs. We tested 29 plasmids  
230 harbouring GFP reporter genes with synonymous changes within the first nine codons (opening  
231 energies of 5.56-21.68 kcal/mol; Supplementary Table S2 and Supplementary Methods). GFP  
232 expression is controlled by an IPTG inducible *T7lac* promoter. In addition, all plasmids harbour a  
233 second reporter gene, i.e. mScarlet-I, which is controlled by the constitutive promoter from the  
234 *nptII* gene for aminoglycoside-3'-O-phosphotransferase of *E. coli* transposon Tn5 (Bindels et al.,  
235 2017; Schlechter et al., 2018). mScarlet-I expression was measured to correct for plasmid copy  
236 number and as a proxy for bacterial growth (Schlechter et al., 2020). As expected, the GFP  
237 level significantly correlates with accessibility (i.e., anti-correlates with opening energy,  
238  $R_s = -0.53$ ,  $P = 3.4 \times 10^{-3}$ ; Fig 6A). Curiously, we observed a diminishing return with opening  
239 energies lower than that of the wild-type sequence (11.68 kcal/mol). To investigate this, we  
240 simulated a protein production experiment by modelling cell growth, transcription, translation,  
241 and turnovers (see Methods). We assumed that opening energies of 12 kcal/mol or below is  
242 favourable in this model, based on our analysis of 8,780 PSI:Biology 'success' group  
243 (Supplementary Fig S6). Interestingly, our *in silico* coarse-grained model shows a similar protein  
244 production trend as the actual experiment (Fig 6B).

245

246 We then tested this finding using the luciferase reporter of *Renilla reniformis* (RLuc). Similarly,  
247 we designed a series of RLuc variants, but with opening energies below that of the wild-type  
248 sequence (5.77-10.38 kcal/mol; Fig 6C and Supplementary Table S2). In addition, we tested  
249 commercially designed sequences, in which sequence optimisations were performed in  
250 full-length rather than the first 9 codons. We observed that TIsigner (9.9 kcal/mol) and  
251 commercially optimised luciferase reporter genes produced significantly higher luminescence  
252 than the wild-type (Fig 6C), although RLuc is poorly soluble in the *E. coli* host (Supplementary  
253 Fig S8). We also found that the levels of wild-type luciferase and many variants with lower  
254 opening energies (5-7 kcal/mol) were not significantly different.

255

256 As both wild-type GFP and RLuc genes are strongly expressed in *E. coli*, we asked whether  
257 poorly expressed proteins can be improved by increasing accessibility of translation initiation

258 sites. We performed densitometric analysis of previously published Western blots, which include  
259 the results of a cell-free expression system using constructs harbouring a wild-type antibody  
260 fragment or archaeobacterial dioxygenase and its synonymous variants (within the first six  
261 codons) (Voges et al., 2004). Indeed, variants with opening energies lower than the wild-type  
262 sequences were expressed at higher levels (Fig 6D).

263

## 264 **DISCUSSION**

265 Our findings show that the accessibility of translation initiation sites is the strongest predictor of  
266 heterologous protein expression in *E. coli*. Whereas previous studies have largely used  
267 minimum free energy models to define the accessibility of a region of interest (Bhattacharyya et  
268 al., 2018; Nieuwkoop et al., 2019; Pelletier and Sonenberg, 1987; Salis et al., 2009; Voges et  
269 al., 2004). However, Terai and Asai (2020) and ourselves have independently discovered that  
270 the opening energy is a better choice for modelling accessibility (Bhandari et al., 2019; Terai and  
271 Asai, 2020) (see Fig 1A for example). Opening energy is an ensemble average energy that  
272 accounts for suboptimal RNA structures that are not reported by minimum free energy models  
273 by default (Bernhart et al., 2011; Mückstein et al., 2006). Currently, the modelling of accessibility  
274 using opening energy is largely used for the prediction of RNA-RNA intermolecular interactions,  
275 for example, as implemented in RNAup and IntaRNA (Lorenz et al., 2011; Mann et al., 2017).  
276 Our study has shown that this approach can be used to identify the key accessibility regions that  
277 are consistent across multiple large expression datasets. We have implemented our findings in  
278 Tlsigner web server, which currently supports recombinant protein expression in *E. coli* and *S.*  
279 *cerevisiae* (optimisation regions -24:24 and -7:89, respectively; see Fig 1). An independent yet  
280 similar implementation is available in XenoExpressO web server with the purpose of optimising  
281 protein expression for an *E. coli* cell-free system (Zayni et al., 2018). The authors showed that  
282 an increase in accessibility of a 30 bp region from the Shine-Dalgarno sequence enhances the  
283 expression level of human voltage dependent anion channel, which further supports our  
284 findings.

285

286 The strengths of our approaches are five-fold. Firstly, the likelihood of success or failure can be  
287 assessed prior to running an experiment. Users can compare the opening energies calculated  
288 for the input and optimised sequences and the distributions of the 'success' and 'failure' of the  
289 PSI:BiologY targets. We also introduced a scoring scheme to score the input and optimised  
290 sequences based upon how likely they are to be expressed (Supplementary Fig S5; also see  
291 Methods). Secondly, optimised sequences can have up to the first nine codons substituted (by  
292 default), meaning that gene optimisation using a standard PCR cloning method is feasible. For  
293 cloning, we propose a nested PCR approach, in which the final PCR reaction utilises a forward  
294 primer designed according to the optimised sequence (Sambrook and Russell, 2001)  
295 (Supplementary Fig S6D). Thirdly, the cost of gene optimisation can be reduced dramatically as  
296 gene synthesis is replaced with PCR using our approach. This enables high-throughput protein  
297 expression screening using the optimised sequences, generated at a low cost. Fourthly, tunable  
298 expression is possible, i.e. high, intermediate or even low expression 5' codon sequences can  
299 be designed, allowing for more control over heterologous protein production, as demonstrated  
300 by our experiments (Fig 4). Finally, our fast, lightweight, coarse-grained simulation approach

301 has opened up new avenues to study several aspects of gene expression, such as transcription,  
302 translation, cellular growth, and turnovers, which give good proxies to how cellular systems  
303 behave.

304

## 305 **MATERIALS AND METHODS**

### 306 **Sequence features analysis**

307 Datasets used in this study are listed in Supplementary Table S1. Representative sequences  
308 were chosen using CD-HIT-EST (Fu et al., 2012; Li and Godzik, 2006). Minimum free energies,  
309 opening energies and avoidance were calculated using RNAfold, RNAplfold and RNAup from  
310 ViennaRNA package (version 2.4.11), respectively (Bernhart et al., n.d., 2011; Bompfünnewerer  
311 et al., 2008; Hofacker et al., 1994; Lorenz et al., 2016, 2011; Mückstein et al., 2006). RNAfold  
312 was run with default parameters. For RNAplfold, sub-sequences were generated from the input  
313 sequences to calculate opening energies (using the parameters -W 210 -u 210). For RNAup, we  
314 examined the stochastic interactions between the region 1:30 of each mRNA and 54 non-coding  
315 RNAs (using the parameters -b -o). RNAup reports the total interaction between two RNAs as  
316 the sum of energy required to open accessible sites in the interacting molecules  $\Delta G_u$  and the  
317 energy gained by subsequent hybridisation  $\Delta G_h$  (Mückstein et al., 2006). For the interactions  
318 between each mRNA and 54 non-coding RNAs, we chose the most stable mRNA:ncRNA pair to  
319 report an inappropriate mRNA:ncRNA interaction, i.e. the pair with the strongest hybridisation  
320 energy,  $(\Delta G_h)_{min}$ .

321

322 CAI, tAI and CC were calculated using the reference weights from Sharp and Li (Sharp and Li,  
323 1987), Tuller et al. (Tuller et al., 2010) and Ang et al. (Ang et al., 2016), respectively. Translation  
324 elongation rate was predicted using Ixnos (Tunney et al., 2018) trained with ribosome profiling  
325 data (SRR7759806 and SRR7759807) (Mohammad et al., 2019).

326

### 327 **Coarse-grained simulation**

328 Our experiments showed a diminishing trend on protein production beyond a certain opening  
329 energy (Fig 4). To explain this, we performed a coarse grained simulation using constructs with  
330 increasing opening energy on a simulated cellular system. Despite being less precise than fine  
331 grained methods such as *ab initio* and molecular dynamics, coarse grained simulations often  
332 give similar results, with an added advantage of being scalable to very large systems.

333

334 To set the simulation, we binned the opening energies between 2 and 32 in intervals of two, with  
335 each bin representing a 'reporter plasmid construct' whose opening energy is the mean of the  
336 bin. For each construct, the 'technical replicates' were generated by allowing slight variations on  
337 the mean opening energy of the bin. This is to model variation between replicates, and the  
338 discrepancies between the estimated and the actual opening energies *in vivo*. For each round of  
339 transcription, mRNA copies were randomly generated from 30 to 60 plasmid DNA copies  
340 (Gomes et al., 2020; Held et al., 2003; Rosano and Ceccarelli, 2014). We chose an optimum  
341 opening energy of 12 kcal/mol or less for translation. However, this is probabilistic which



342 occasionally allowed protein production from higher opening energy transcripts. We allowed  
343 mRNA to decay probabilistically when a mRNA molecule is translated for more than 10 rounds.  
344

345 We also set a threshold of protein tolerance to be 1,000,000 copies where the copy numbers of  
346 endogenous proteins are usually less than 10,000 (Taniguchi et al., 2010), beyond which there  
347 is a sporadic death of cells. However, in this simulation, the chances of staying viable and  
348 reproducing are higher than death, and cells grow steadily. This threshold also simulated  
349 random but low cell deaths in the experiment, without setting an extra variable.

350

351 To limit the computational complexity, our coarse-grained simulations used lower constants and  
352 iterations. Initialising with 100 cells, the algorithm was set to terminate either after 10,000  
353 iterations or when the total number of cells becomes zero. After termination, the total number of  
354 proteins and cells for each construct were taken from the endpoints. To imitate 'biological  
355 replicates', we repeated the above simulation three times with different random numbers, which  
356 provides slightly different initial conditions for each experiment.

357

### 358 **Tlsigner development**

359 Finding a synonymous sequence with a maximum accessibility is a combinatorial problem that  
360 spans a vast search space. For example, for a protein-coding sequence of nine codons,  
361 assuming an average of 3 synonymous codons per amino acid, we can expect a total of 19,682  
362 unique synonymous coding sequences. This number increases rapidly with increasing numbers  
363 of codons. Heuristic optimisation approaches are preferred in such situations because the  
364 search space can be explored more efficiently to obtain nearly optimal solutions.

365

366 To optimise the accessibility of a given sequence, Tlsigner uses a simulated annealing algorithm  
367 (Brownlee, 2011; Ingber, 2000; Keith et al., 2002; Kirkpatrick et al., 1983), a heuristic  
368 optimisation technique based on the thermodynamics of a system settling into a low energy  
369 state after cooling. Simulated annealing algorithms have been used to solve many combinatorial  
370 optimisation problems in bioinformatics. For example, we previously applied this algorithm to  
371 align and predict non-coding RNAs from multiple sequences (Lindgreen et al., 2007). Other  
372 studies use this algorithm to find consensus sequences (Keith et al., 2002), optimise ribosome  
373 binding sites (Salis et al., 2009) and predict mRNA foldings (Gaspar et al., 2013) using minimum  
374 free energy models.

375

376 According to statistical mechanics, the probability  $p_i$  of a system occupying energy state  $E_i$ ,  
377 with temperature  $T$ , follows a Boltzmann distribution of the form  $e^{-E_i/T}$ , which gives a set of  
378 probability mass functions along every point  $i$  in the solution space. Using a Markov chain  
379 sampling, these probabilities are sampled such that each point has a lower temperature than  
380 the previous one. As the system is cooled from high to low temperatures ( $T \rightarrow 0$ ), the samples  
381 converge to a minimum of  $E$ , which in many cases will be the global minimum (Keith et al.,  
382 2002). A frequently used Markov chain sampling technique is Metropolis-Hastings algorithm in

383 which a 'bad' move  $E_2$  from initial state  $E_1$  such that  $E_2 > E_1$ , is accepted if  $R(0, 1) \geq p_2/p_1$ ,  
384 where  $R(0, 1)$  is a uniformly random number between 0 and 1.

385

386 In our implementation, each iteration consists of a move that may involve multiple synonymous  
387 codon substitutions. The algorithm begins at a high temperature where the first move is drastic,  
388 synonymous substitutions occur in all replaceable codons. At the end of the first iteration, a new  
389 sequence is accepted if the opening energy is smaller than that of the input sequence. However,  
390 if the opening energy of a new sequence is greater than that of the input sequence, acceptance  
391 depends on the Metropolis-Hastings criteria. The accepted sequence is used for the next  
392 iteration, which repeats the above process. As the temperature cools, the moves get milder with  
393 fewer synonymous codon changes (Supplementary Fig S6A). Simulated annealing stops upon  
394 reaching a near-optimum solution.

395

396 For the web version of Tlsigner, the default number of replaceable codons is restricted to the  
397 first nine codons. However, this default setting can be reset to range from the first four to nine  
398 codons, or the full length of the coding sequence. Since the accessibility of a fixed region is  
399 optimised, this process only takes  $O(1)$  time (Supplementary Fig S7). Furthermore, Tlsigner  
400 runs multiple simulated annealing instances, in parallel, to obtain multiple possible sequence  
401 solutions.

402

403 When users select *T7lac* promoter as the 5'UTR, they can adjust 'Expression Score', that is  
404 calculated based on the PSI:BiologY dataset (see below). This allows them to tune the  
405 expression level of a target gene. In contrast, when users input a custom 5'UTR sequence, they  
406 only have the option to either maximise or minimise expression.

407

408 To implement 'Expression Score', the posterior probabilities of success for input and optimised  
409 sequences are evaluated using the following equations from Bayesian statistics:

410

$$411 \text{ positive posterior odds} = \text{prior odds} \times \text{fitted positive likelihood ratio} \quad (1)$$

$$412 \text{ positive posterior probability} = \frac{\text{positive posterior odds}}{(1 + \text{positive posterior odds})} \quad (2)$$

413

414 The fitted positive likelihood ratios in equation (1) were obtained from the following 4-parametric  
415 logistic regression equation:

416

$$417 \text{ fitted positive likelihood ratio} = d + \frac{a-d}{1 + \left(\frac{\text{positive likelihood ratio}}{c}\right)^b} \quad (3)$$

418

419 with parameters a, b, c, and d. The prior probability was set to 0.49, which is the proportion of  
420 'Expressed' (N=21,046) divided by 'Cloned' (N=42,774) of the PSI:BiologY targets reported as of  
421 28 June 2017 (<http://targetdb.rcsb.org/metrics/>). Posterior probabilities were scaled as  
422 percentages to score the input and optimised sequences.

423

424 The presence of terminator-like elements (Chen et al., 2013) in the protein-coding region may  
425 result in expression of truncated mRNAs due to early transcription termination. Therefore, we  
426 implemented an optional check for putative terminators in the input and optimised sequences by  
427 cmsearch (INFERNAL version 1.1.2) (Nawrocki and Eddy, 2013) using the covariance models of  
428 terminators from RMfam (Gardner and Eldai, 2015; Kalvari et al., 2018). We also allow users to  
429 filter the output sequences for the presence of restriction sites. Restriction modification sites  
430 (AarI, BsaI, and BsmBI) are avoided by default.

431

432 Besides *E. coli*, users can choose *S. cerevisiae*, *M. musculus* or 'Other' as the expression host.  
433 The regions for optimising accessibility are -7:89, -8:11 and -24:89 for *S. cerevisiae*, *M.*  
434 *musculus* and 'Other', respectively (Fig 1 and Supplementary Fig S1). When users choose  
435 'Custom' for expression host, the region for optimising accessibility becomes customisable.

436

### 437 **Sequence optimisation**

438 We submitted the PSI:Biology targets that failed to be expressed (N=2,650) to the ExpOptimizer  
439 web server from NovoPro Bioscience (<https://www.novoprolabs.com/tools/codon-optimization>).  
440 A total of 2,573 sequences were optimised. The target sequences were also optimised using a  
441 local version of COOL (Chung and Lee, 2012) and TIsigner using default settings. We also ran  
442 a random synonymous codon substitution as a control for these 2,573 sequences.

443

### 444 **GFP assay**

445 Plasmids were constructed using the MIDAS Golden Gate cloning system (Supplementary  
446 Methods) (van Dolleweerd et al., 2018). BL21(DE3)pLysS competent *E. coli* cells (Invitrogen)  
447 were transformed with plasmids and grown overnight on Luria-Bertani (LB) agar plates  
448 containing spectinomycin (50 µg/ml) and chloramphenicol (25 µg/ml). Single colonies were  
449 picked and inoculated into 3 ml LB broth containing the same antibiotics, and cultures were  
450 grown for 18 hours at 37°C, 200 rpm. Cultures were diluted with fresh media at 1:20 and grown  
451 at 37°C, 200 rpm, until reaching the mid-logarithmic growth phase (optical densities at 600 nm  
452 (OD<sub>600</sub>) of ~0.3). Of each culture, 20 µl was seeded into 96-well plates containing 180 µl LB  
453 broth supplemented with antibiotics and isopropyl-β-D thiogalactopyranoside (IPTG) (1 mM final  
454 concentration) per well. Fluorescence intensities and ODs were measured in a black, flat, clear  
455 bottom 96-well plate with lid (CELLSTAR, Greiner) using a FLUOstar Omega plate reader (BMG  
456 Labtech) equipped with an excitation filter (band pass 485-12) and an emission filter (band pass  
457 520) for GFP and excitation filter (band pass 484) and an emission filter (band pass 610-10) for  
458 mScarlet-I. The plate was incubated at 37°C with "meander corner well shaking" at 300 rpm for  
459 7 hours measuring fluorescence and ODs every 10 minutes. Fluorescence was measured in a 2  
460 mm circle recording the average of 8 measurements per well. Average values of technical  
461 replicates were calculated and normalised to the mScarlet-I second reporter, and then to the  
462 normalised value of the GFP variant with the highest opening energy (21.68 kcal/mol).  
463 Normalised fluorescence values were obtained from the average values of biological replicates  
464 (Supplementary Table S2).

465

### 466 **Luciferase assay**

467 BL21Star(DE3) competent cells (Invitrogen) were transformed with plasmids and grown  
468 overnight at 37°C on LB agar plates containing 50 µg/ml spectinomycin. Single colonies were  
469 picked and inoculated into 5 ml LB broth (50 µg/ml spectinomycin) and grown for 18 hours at  
470 37°C, 200 rpm. Bacterial cultures were diluted with fresh media at 1:20 and grown at 37°C, 200  
471 rpm, up to a mid-logarithmic phase (OD<sub>600</sub> of ~0.4). The cultures were split and induced with  
472 IPTG at a final concentration of 0.25 mM (or uninduced as controls), and seeded into a white,  
473 flat, clear bottom 96-well white plate with lid (Costar, Corning), 150 µl per well, in triplicates.  
474 Cells were incubated in a FLUOstar Omega Microplate Reader (BMG LABTECH) for 90 minutes  
475 at 25°C, 200 rpm, and OD<sub>600</sub> was measured every 15 minutes (over 7 cycles). Cells were  
476 harvested by centrifugation at 3000 ×g, for 10 minutes, at 20°C. Supernatants were removed.  
477 As the substrate can penetrate into cells, 50 µl of coelenterazine h (Promega) was added to  
478 living cells to minimise sample processing steps and variability (Fuhrmann et al., 2004; Lorenz  
479 et al., 1996). Luminescence was measured ( $\lambda_{em} = 475$  nm) in a Clariostar microplate reader  
480 (BMG LABTECH) at 25°C every 2 minutes (over 11 cycles). Average values of technical  
481 replicates were calculated and normalised to the wild-type. Normalised luminescence values  
482 were obtained from the average values of biological replicates (Supplementary Table S2).

483

#### 484 **Statistical analysis**

485 AUC and Gini importance scores were calculated using scikit-learn (version 0.20.2) (Pedregosa  
486 et al., 2011). The 95% confidence intervals for AUC scores were calculated using DeLong's  
487 method (DeLong et al., 1988). Spearman's correlation coefficients and Kolmogorov-Smirnov  
488 statistics were calculated using Pandas (version 0.23.4) (McKinney, 2010) and scipy (version  
489 1.2.1) (Millman and Aivazis, 2011; Oliphant, 2007), respectively. Positive likelihood ratios with  
490 95% confidence intervals were calculated using the bootLR package (Marill et al., 2017; R Core  
491 Team, 2019). The P-values of multiple testing were adjusted using Bonferroni's correction and  
492 reported to machine precision. Plots were generated using Matplotlib (version 3.0.2)  
493 ("Matplotlib: A 2D Graphics Environment - IEEE Journals & Magazine," n.d.) and Seaborn  
494 (version 0.9.0) (Waskom et al., 2018).

495

#### 496 **Code and data availability**

497 Our code and data can be found in our GitHub repository  
498 ([https://github.com/Gardner-Binflab/TIsigner\\_paper\\_2019](https://github.com/Gardner-Binflab/TIsigner_paper_2019)). These include the scripts and  
499 Jupyter notebooks to reproduce our results and figures. The source code of TIsigner is available  
500 at <https://github.com/Gardner-Binflab/TISIGNER-ReactJS>. The public web version of this tool  
501 runs at <https://tisigner.com/tisigner>. The experimental data, analysis and results are available at  
502 <https://github.com/bkb3/TIsignerExperiment/tree/master/Jupyter> and an interactive version of  
503 results are available at <https://bkb3.github.io/TIsignerExperiment/>.

504

#### 505 **ACKNOWLEDGEMENTS**

506 We thank Professor Ivo Hofacker for fruitful discussions at the Benasque RNA Meeting, and Dr  
507 Ronny Lorenz for helpful discussions about RNAPfold. We are grateful to the members of the  
508 Biomolecular Interaction Centre at the University of Canterbury for supporting this research. We  
509 thank New Zealand eScience Infrastructure for providing high performance computing

510 resources. This work was supported in part by the Ministry of Business, Innovation and  
511 Employment [MBIE Smart Idea grant: UOOX1709 and MBIE Data Science Programmes grant:  
512 UOAX1932] and the Royal Society of New Zealand Te Apārangi [Marsden grant: 19-UOO-040].

513

#### 514 **AUTHOR CONTRIBUTIONS**

515 C.S.L. and P.P.G. conceived the work; C.S.L. contributed RNA accessibility analyses; B.K.B.  
516 performed the coarse-grained simulation and developed the TIsigner web server; C.D., D.M.R.,  
517 and A.C. constructed the plasmids, performed the GFP assay, and the luciferase assay,  
518 respectively. C.S.L. and B.K.B. analysed the data and drafted the manuscript. All authors  
519 reviewed, edited and approved the manuscript.

520

#### 521 **COMPETING INTERESTS**

522 The authors declare no competing interests.

523

#### 524 **REFERENCES**

- 525 Abreu R de S, de Sousa Abreu R, Penalva LO, Marcotte EM, Vogel C. 2009. Global signatures  
526 of protein and mRNA expression levels. *Molecular BioSystems*. doi:10.1039/b908315d
- 527 Acton TB, Gunsalus KC, Xiao R, Ma LC, Aramini J, Baran MC, Chiang Y-W, Climent T, Cooper  
528 B, Denissova NG, Douglas SM, Everett JK, Ho CK, Macapagal D, Rajan PK, Shastry R,  
529 Shih L-Y, Swapna GVT, Wilson M, Wu M, Gerstein M, Inouye M, Hunt JF, Montelione GT.  
530 2005. Robotic cloning and Protein Production Platform of the Northeast Structural  
531 Genomics Consortium. *Methods Enzymol* **394**:210–243.
- 532 Ang KS, Kyriakopoulos S, Li W, Lee D-Y. 2016. Multi-omics data driven analysis establishes  
533 reference codon biases for synthetic gene design in microbial and mammalian cells.  
534 *Methods*. doi:10.1016/j.ymeth.2016.01.016
- 535 Ben-Yehzekel T, Atar S, Zur H, Diamant A, Goz E, Marx T, Cohen R, Dana A, Feldman A,  
536 Shapiro E, Tuller T. 2015. Rationally designed, heterologous *S. cerevisiae* transcripts  
537 expose novel expression determinants. *RNA Biol* **12**:972–984.
- 538 Berlec A, Strukelj B. 2013. Current state and recent advances in biopharmaceutical production  
539 in *Escherichia coli*, yeasts and mammalian cells. *J Ind Microbiol Biotechnol* **40**:257–274.
- 540 Bernhart SH, Mückstein U, Hofacker IL. 2011. RNA Accessibility in cubic time. *Algorithms Mol*  
541 *Biol* **6**:3.
- 542 Bernhart S, Hofacker IL, Stadler PF. n.d. Local Base Pairing Probabilities in Large RNAs.  
543 *Bioinformatics*.
- 544 Bernstein JA, Khodursky AB, Lin P-H, Lin-Chao S, Cohen SN. 2002. Global analysis of mRNA  
545 decay and abundance in *Escherichia coli* at single-gene resolution using two-color  
546 fluorescent DNA microarrays. *Proc Natl Acad Sci U S A* **99**:9697–9702.
- 547 Bhandari BK, Lim CS, Gardner PP. 2019. Highly accessible translation initiation sites are  
548 predictive of successful heterologous protein expression. *BioRxiv*. doi:10.1101/726752
- 549 Bhattacharyya S, Jacobs WM, Adkar BV, Yan J, Zhang W, Shakhnovich EI. 2018. Accessibility  
550 of the Shine-Dalgarno Sequence Dictates N-Terminal Codon Bias in *E. coli*. *Mol Cell*  
551 **70**:894–905.e5.
- 552 Bindels DS, Haarbosch L, van Weeren L, Postma M, Wiese KE, Mastop M, Aumonier S,  
553 Gotthard G, Royant A, Hink MA, Gadella TWJ Jr. 2017. mScarlet: a bright monomeric red  
554 fluorescent protein for cellular imaging. *Nat Methods* **14**:53–56.

- 555 Boël G, Letso R, Neely H, Nicholson Price W, Wong K-H, Su M, Luff JD, Valecha M, Everett JK,  
556 Acton TB, Xiao R, Montelione GT, Aalberts DP, Hunt JF. 2016. Codon influence on protein  
557 expression in *E. coli* correlates with mRNA levels. *Nature*. doi:10.1038/nature16509
- 558 Bompfünewerer AF, Backofen R, Bernhart SH, Hertel J, Hofacker IL, Stadler PF, Will S. 2008.  
559 Variations on RNA folding and alignment: lessons from Benasque. *J Math Biol* **56**:129–144.
- 560 Brownlee J. 2011. *Clever Algorithms: Nature-inspired Programming Recipes*. Jason Brownlee.
- 561 Brule CE, Grayhack EJ. 2017. Synonymous Codons: Choose Wisely for Expression. *Trends*  
562 *Genet* **33**:283–297.
- 563 Cambray G, Guimaraes JC, Arkin AP. 2018. Evaluation of 244,000 synthetic sequences reveals  
564 design principles to optimize translation in *Escherichia coli*. *Nat Biotechnol* **36**:1005–1015.
- 565 Chen L, Oughtred R, Berman HM, Westbrook J. 2004. TargetDB: a target registration database  
566 for structural genomics projects. *Bioinformatics* **20**:2860–2862.
- 567 Chen Y-J, Liu P, Nielsen AAK, Brophy JAN, Clancy K, Peterson T, Voigt CA. 2013.  
568 Characterization of 582 natural and synthetic terminators and quantification of their design  
569 constraints. *Nat Methods* **10**:659–664.
- 570 Chung BK-S, Lee D-Y. 2012. Computational codon optimization of synthetic gene for protein  
571 expression. *BMC Syst Biol* **6**:134.
- 572 DeLong ER, DeLong DM, Clarke-Pearson DL. 1988. Comparing the areas under two or more  
573 correlated receiver operating characteristic curves: a nonparametric approach. *Biometrics*  
574 **44**:837–845.
- 575 Delvigne F, Baert J, Sassi H, Fickers P, Grünberger A, Dusny C. 2017. Taking control over  
576 microbial populations: Current approaches for exploiting biological noise in bioprocesses.  
577 *Biotechnol J* **12**. doi:10.1002/biot.201600549
- 578 de Smit MH, van Duijn J. 1990. Secondary structure of the ribosome binding site determines  
579 translational efficiency: a quantitative analysis. *Proc Natl Acad Sci U S A* **87**:7668–7672.
- 580 Deuschle U, Kammerer W, Gentz R, Bujard H. 1986. Promoters of *Escherichia coli*: a hierarchy  
581 of in vivo strength indicates alternate structures. *EMBO J* **5**:2987–2994.
- 582 Dvir S, Velten L, Sharon E, Zeevi D, Carey LB, Weinberger A, Segal E. 2013. Deciphering the  
583 rules by which 5'-UTR sequences affect protein expression in yeast. *Proc Natl Acad Sci U*  
584 *S A* **110**:E2792–801.
- 585 Fuhrmann M, Hausherr A, Ferbitz L, Schödl T, Heitzer M, Hegemann P. 2004. Monitoring  
586 dynamic expression of nuclear genes in *Chlamydomonas reinhardtii* by using a synthetic  
587 luciferase reporter gene. *Plant Mol Biol* **55**:869–881.
- 588 Fu L, Niu B, Zhu Z, Wu S, Li W. 2012. CD-HIT: accelerated for clustering the next-generation  
589 sequencing data. *Bioinformatics* **28**:3150–3152.
- 590 Gardner PP, Eldai H. 2015. Annotating RNA motifs in sequences and alignments. *Nucleic Acids*  
591 *Res* **43**:691–698.
- 592 Gaspar P, Moura G, Santos MAS, Oliveira JL. 2013. mRNA secondary structure optimization  
593 using a correlated stem-loop prediction. *Nucleic Acids Res* **41**:e73.
- 594 Gomes L, Monteiro G, Mergulhão F. 2020. The Impact of IPTG Induction on Plasmid Stability  
595 and Heterologous Protein Expression by Biofilms. *Int J Mol Sci* **21**.  
596 doi:10.3390/ijms21020576
- 597 Gutman GA, Hatfield GW. 1989. Nonrandom utilization of codon pairs in *Escherichia coli*. *Proc*  
598 *Natl Acad Sci U S A* **86**:3699–3703.
- 599 Hanson G, Collier J. 2018. Codon optimality, bias and usage in translation and mRNA decay.  
600 *Nat Rev Mol Cell Biol* **19**:20–30.
- 601 Held D, Yaeger K, Novy R. 2003. New coexpression vectors for expanded compatibilities in *E.*  
602 *coli* (No. 18). Novagen.

- 603 Hofacker IL, Fontana W, Stadler PF, Bonhoeffer LS, Tacker M, Schuster P. 1994. Fast folding  
604 and comparison of RNA secondary structures. *Monatshefte für Chemie / Chemical Monthly*  
605 **125**:167–188.
- 606 Ingber L. 2000. Adaptive simulated annealing (ASA): Lessons learned.
- 607 Kalvari I, Argasinska J, Quinones-Olvera N, Nawrocki EP, Rivas E, Eddy SR, Bateman A, Finn  
608 RD, Petrov AI. 2018. Rfam 13.0: shifting to a genome-centric resource for non-coding RNA  
609 families. *Nucleic Acids Res* **46**:D335–D342.
- 610 Keith JM, Adams P, Bryant D, Kroese DP, Mitchelson KR, Cochran DAE, Lala GH. 2002. A  
611 simulated annealing algorithm for finding consensus sequences. *Bioinformatics*  
612 **18**:1494–1499.
- 613 Kimelman A, Levy A, Sberro H, Kidron S, Leavitt A, Amitai G, Yoder-Himes DR, Wurtzel O, Zhu  
614 Y, Rubin EM, Sorek R. 2012. A vast collection of microbial genes that are toxic to bacteria.  
615 *Genome Res* **22**:802–809.
- 616 Kirkpatrick S, Gelatt CD, Vecchi MP. 1983. Optimization by Simulated Annealing. *Science*.  
617 doi:10.1126/science.220.4598.671
- 618 Kudla G, Murray AW, Tollervey D, Plotkin JB. 2009. Coding-sequence determinants of gene  
619 expression in *Escherichia coli*. *Science* **324**:255–258.
- 620 Lim CS, Wardell SJT, Kleffmann T, Brown CM. 2018. The exon–intron gene structure upstream  
621 of the initiation codon predicts translation efficiency. *Nucleic Acids Research*.  
622 doi:10.1093/nar/gky282
- 623 Lindgreen S, Gardner PP, Krogh A. 2007. MASTR: multiple alignment and structure prediction  
624 of non-coding RNAs using simulated annealing. *Bioinformatics* **23**:3304–3311.
- 625 Li W, Godzik A. 2006. Cd-hit: a fast program for clustering and comparing large sets of protein  
626 or nucleotide sequences. *Bioinformatics*. doi:10.1093/bioinformatics/btl158
- 627 Lorenz R, Bernhart SH, Höner Zu Siederdisen C, Tafer H, Flamm C, Stadler PF, Hofacker IL.  
628 2011. ViennaRNA Package 2.0. *Algorithms Mol Biol* **6**:26.
- 629 Lorenz R, Hofacker IL, Stadler PF. 2016. RNA folding with hard and soft constraints. *Algorithms*  
630 *Mol Biol* **11**:8.
- 631 Lorenz WW, Cormier MJ, O’Kane DJ, Hua D, Escher AA, Szalay AA. 1996. Expression of the  
632 *Renilla reniformis* luciferase gene in mammalian cells. *J Biolumin Chemilumin* **11**:31–37.
- 633 Mann M, Wright PR, Backofen R. 2017. IntaRNA 2.0: enhanced and customizable prediction of  
634 RNA–RNA interactions. *Nucleic Acids Res* **45**:W435–W439.
- 635 Marill KA, Chang Y, Wong KF, Friedman AB. 2017. Estimating negative likelihood ratio  
636 confidence when test sensitivity is 100%: A bootstrapping approach. *Stat Methods Med Res*  
637 **26**:1936–1948.
- 638 Matplotlib: A 2D Graphics Environment - IEEE Journals & Magazine. n.d.  
639 <https://doi.org/10.1109/MCSE.2007.55>
- 640 McKinney W. 2010. Data Structures for Statistical Computing in Python Proceedings of the 9th  
641 Python in Science Conference. pp. 51–56.
- 642 Millman KJ, Aivazis M. 2011. Python for Scientists and Engineers. *Computing in Science*  
643 *Engineering* **13**:9–12.
- 644 Mittal P, Brindle J, Stephen J, Plotkin JB, Kudla G. 2018. Codon usage influences fitness  
645 through RNA toxicity. *Proc Natl Acad Sci U S A* **115**:8639–8644.
- 646 Mohammad F, Green R, Buskirk AR. 2019. A systematically-revised ribosome profiling method  
647 for bacteria reveals pauses at single-codon resolution. *Elife* **8**. doi:10.7554/eLife.42591
- 648 Mückstein U, Tafer H, Hackermüller J, Bernhart SH, Stadler PF, Hofacker IL. 2006.  
649 Thermodynamics of RNA–RNA binding. *Bioinformatics* **22**:1177–1182.
- 650 Nawrocki EP, Eddy SR. 2013. Infernal 1.1: 100-fold faster RNA homology searches.

- 651 *Bioinformatics*. doi:10.1093/bioinformatics/btt509
- 652 Nieuwkoop T, Claassens NJ, van der Oost J. 2019. Improved protein production and codon  
653 optimization analyses in *Escherichia coli* by bicistronic design. *Microb Biotechnol*  
654 **12**:173–179.
- 655 Nilsson T, Mann M, Aebersold R, Yates JR 3rd, Bairoch A, Bergeron JJM. 2010. Mass  
656 spectrometry in high-throughput proteomics: ready for the big time. *Nat Methods*  
657 **7**:681–685.
- 658 Noderer WL, Flockhart RJ, Bhaduri A, Diaz de Arce AJ, Zhang J, Khavari PA, Wang CL. 2014.  
659 Quantitative analysis of mammalian translation initiation sites by FACS-seq. *Mol Syst Biol*  
660 **10**:748.
- 661 Oliphant TE. 2007. Python for Scientific Computing. *Computing in Science Engineering*  
662 **9**:10–20.
- 663 Osterman IA, Chervontseva ZS, Evratov SA, Sorokina AV, Rodin VA, Rubtsova MP, Komarova  
664 ES, Zatspein TS, Kabilov MR, Bogdanov AA, Gelfand MS, Dontsova OA, Sergiev PV. 2020.  
665 Translation at first sight: the influence of leading codons. *Nucleic Acids Res* **48**:6931–6942.
- 666 Pedregosa F, Varoquaux G, Gramfort A, Michel V, Thirion B, Grisel O, Blondel M, Prettenhofer  
667 P, Weiss R, Dubourg V, Vanderplas J, Passos A, Cournapeau D, Brucher M, Perrot M,  
668 Duchesnay É. 2011. Scikit-learn: Machine Learning in Python. *J Mach Learn Res*  
669 **12**:2825–2830.
- 670 Pelletier J, Sonenberg N. 1987. The involvement of mRNA secondary structure in protein  
671 synthesis. *Biochem Cell Biol* **65**:576–581.
- 672 Plotkin JB, Kudla G. 2011. Synonymous but not the same: the causes and consequences of  
673 codon bias. *Nature Reviews Genetics*. doi:10.1038/nrg2899
- 674 Raab D, Graf M, Notka F, Schödl T, Wagner R. 2010. The GeneOptimizer Algorithm: using a  
675 sliding window approach to cope with the vast sequence space in multiparameter DNA  
676 sequence optimization. *Syst Synth Biol* **4**:215–225.
- 677 R Core Team. 2019. R: A Language and Environment for Statistical Computing. Vienna: R  
678 Foundation for Statistical Computing.
- 679 Reis M d., d. Reis M. 2004. Solving the riddle of codon usage preferences: a test for  
680 translational selection. *Nucleic Acids Research*. doi:10.1093/nar/gkh834
- 681 Rosano GL, Ceccarelli EA. 2014. Recombinant protein expression in *Escherichia coli*: advances  
682 and challenges. *Front Microbiol* **5**:172.
- 683 Sabi R, Tuller T. 2014. Modelling the Efficiency of Codon–tRNA Interactions Based on Codon  
684 Usage Bias. *DNA Research*. doi:10.1093/dnares/dsu017
- 685 Salis HM, Mirsky EA, Voigt CA. 2009. Automated design of synthetic ribosome binding sites to  
686 control protein expression. *Nature Biotechnology*. doi:10.1038/nbt.1568
- 687 Sambrook J, Russell DW. 2001. Molecular cloning: a laboratory manual. Vol. 3. CSHL Press.
- 688 Schlechter RO, Jun H, Bernach M, Oso S, Boyd E, Muñoz-Lintz DA, Dobson RCJ, Remus DM,  
689 Remus-Emsermann MNP. 2018. Chromatic Bacteria - A Broad Host-Range Plasmid and  
690 Chromosomal Insertion Toolbox for Fluorescent Protein Expression in Bacteria. *Front*  
691 *Microbiol* **9**:3052.
- 692 Schlechter RO, Remus DM, Remus-Emsermann MNP. 2020. Constitutively expressed  
693 fluorescent proteins allow to track bacterial growth and to determine relative fitness of  
694 bacteria in mixed cultures. *Cold Spring Harbor Laboratory*. doi:10.1101/2020.12.01.399113
- 695 Schwanhäusser B, Busse D, Li N, Dittmar G, Schuchhardt J, Wolf J, Chen W, Selbach M. 2011.  
696 Global quantification of mammalian gene expression control. *Nature* **473**:337–342.
- 697 Seiler CY, Park JG, Sharma A, Hunter P, Surapaneni P, Sedillo C, Field J, Algar R, Price A,  
698 Steel J, Throop A, Fiocco M, LaBaer J. 2014. DNASU plasmid and PSI:BiologY-Materials



- 699 repositories: resources to accelerate biological research. *Nucleic Acids Res* **42**:D1253–60.
- 700 Sharp PM, Li WH. 1987. The codon Adaptation Index--a measure of directional synonymous  
701 codon usage bias, and its potential applications. *Nucleic Acids Res* **15**:1281–1295.
- 702 Shine J, Dalgarno L. 1974. The 3'-terminal sequence of Escherichia coli 16S ribosomal RNA:  
703 complementarity to nonsense triplets and ribosome binding sites. *Proc Natl Acad Sci U S A*  
704 **71**:1342–1346.
- 705 Stevens SG, Brown CM. 2013. In silico estimation of translation efficiency in human cell lines:  
706 potential evidence for widespread translational control. *PLoS One* **8**:e57625.
- 707 Tabb DL, Vega-Montoto L, Rudnick PA, Variyath AM, Ham A-JL, Bunk DM, Kilpatrick LE,  
708 Billheimer DD, Blackman RK, Cardasis HL, Others. 2009. Repeatability and reproducibility  
709 in proteomic identifications by liquid chromatography- tandem mass spectrometry. *J*  
710 *Proteome Res* **9**:761–776.
- 711 Taniguchi Y, Choi PJ, Li G-W, Chen H, Babu M, Hearn J, Emili A, Xie XS. 2010. Quantifying E.  
712 coli proteome and transcriptome with single-molecule sensitivity in single cells. *Science*  
713 **329**:533–538.
- 714 Terai G, Asai K. 2020. Improving the prediction accuracy of protein abundance in Escherichia  
715 coli using mRNA accessibility. *Nucleic Acids Res* **48**:e81–e81.
- 716 Terai G, Kamegai S, Asai K. 2016. CDSfold: an algorithm for designing a protein-coding  
717 sequence with the most stable secondary structure. *Bioinformatics* **32**:828–834.
- 718 Tuller T, Waldman YY, Kupiec M, Ruppin E. 2010. Translation efficiency is determined by both  
719 codon bias and folding energy. *Proc Natl Acad Sci U S A* **107**:3645–3650.
- 720 Tuller T, Zur H. 2015. Multiple roles of the coding sequence 5' end in gene expression  
721 regulation. *Nucleic Acids Research*. doi:10.1093/nar/gku1313
- 722 Tunney R, McGlincy NJ, Graham ME, Naddaf N, Pachter L, Lareau LF. 2018. Accurate design  
723 of translational output by a neural network model of ribosome distribution. *Nat Struct Mol*  
724 *Biol* **25**:577–582.
- 725 Umu SU, Poole AM, Dobson RC, Gardner PP. 2016. Avoidance of stochastic RNA interactions  
726 can be harnessed to control protein expression levels in bacteria and archaea. *Elife* **5**.  
727 doi:10.7554/eLife.13479
- 728 van Dolleweerd CJ, Kessans SA, Van de Bittner KC, Bustamante LY, Bundela R, Scott B,  
729 Nicholson MJ, Parker EJ. 2018. MIDAS: A Modular DNA Assembly System for Synthetic  
730 Biology. *ACS Synth Biol* **7**:1018–1029.
- 731 Verma M, Choi J, Cottrell KA, Lavagnino Z, Thomas EN, Pavlovic-Djuranovic S, Szczesny P,  
732 Piston DW, Zaher HS, Puglisi JD, Djuranovic S. 2019. A short translational ramp  
733 determines the efficiency of protein synthesis. *Nat Commun* **10**:5774.
- 734 Villalobos A, Ness JE, Gustafsson C, Minshull J, Govindarajan S. 2006. Gene Designer: a  
735 synthetic biology tool for constructing artificial DNA segments. *BMC Bioinformatics* **7**:285.
- 736 Voges D, Watzel M, Nemetz C, Wizemann S, Buchberger B. 2004. Analyzing and enhancing  
737 mRNA translational efficiency in an Escherichia coli in vitro expression system. *Biochem*  
738 *Biophys Res Commun* **318**:601–614.
- 739 Wang M, Herrmann CJ, Simonovic M, Szklarczyk D, von Mering C. 2015. Version 4.0 of PaxDb:  
740 Protein abundance data, integrated across model organisms, tissues, and cell-lines.  
741 *Proteomics* **15**:3163–3168.
- 742 Waskom M, Botvinnik O, O'Kane D, Hobson P, Ostblom J, Lukauskas S, Gemperline DC,  
743 Augspurger T, Halchenko Y, Cole JB, Warmenhoven J, de Ruiter J, Pye C, Hoyer S,  
744 Vanderplas J, Villalba S, Kunter G, Quintero E, Bachant P, Martin M, Meyer K, Miles A,  
745 Ram Y, Brunner T, Yarkoni T, Williams ML, Evans C, Fitzgerald C, Brian, Qalieh A. 2018.  
746 mwaskom/seaborn: v0.9.0 (July 2018). doi:10.5281/zenodo.1313201

747 Zayni S, Damiati S, Moreno-Flores S, Amman F, Hofacker I, Ehmoser E-K. 2018. Enhancing the  
748 cell-free expression of native membrane proteins by in-silico optimization of the coding  
749 sequence – an experimental study of the human voltage-dependent anion channel.  
750 *BioRxiv*. doi:10.1101/411694

751  
752  
753  
754  
755  
756  
757  
758  
759  
760  
761  
762  
763  
764  
765  
766  
767  
768  
769  
770  
771  
772  
773  
774  
775  
776  
777  
778  
779  
780  
781  
782  
783  
784  
785  
786  
787  
788

789 **Figures**

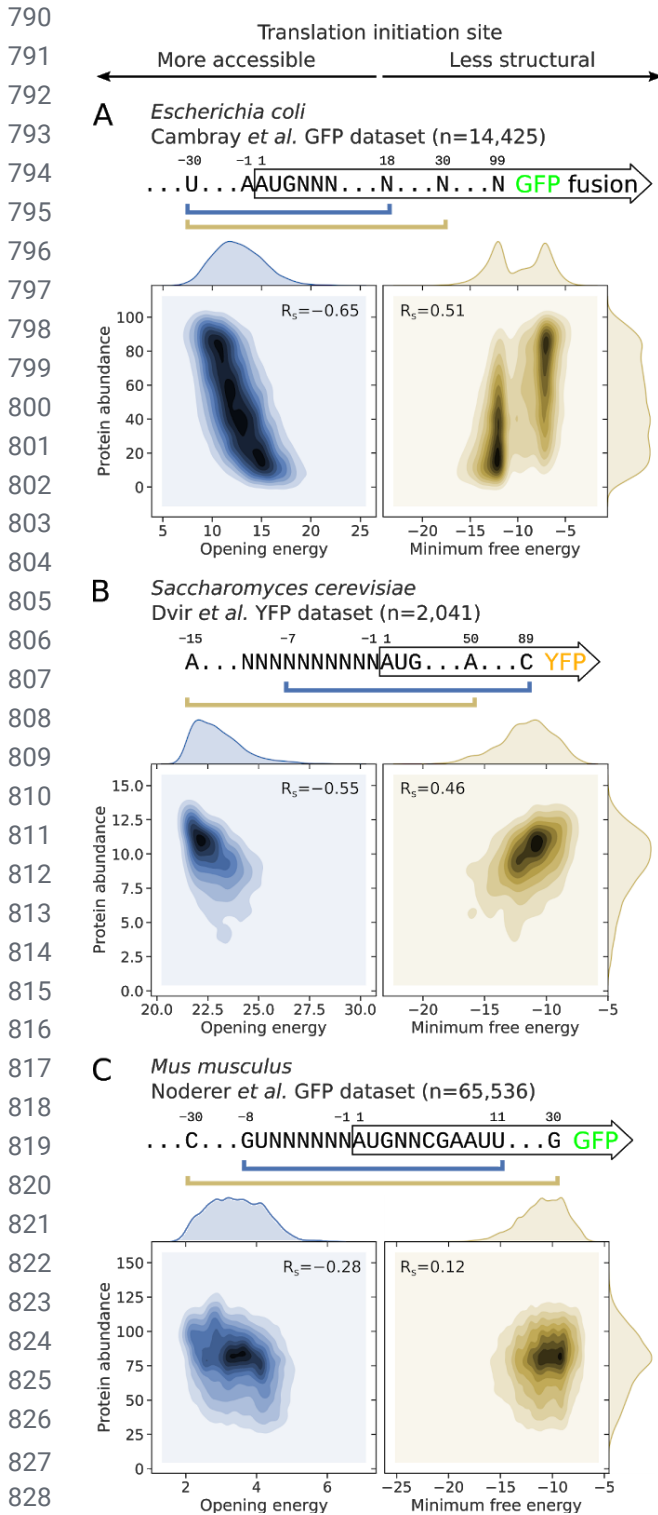

**Fig 1. Correlations between the opening energies of translation initiation sites and protein abundance are stronger than that of minimum free energy. (A)** For *E. coli*, the opening energy at the region -30:18 shows the strongest correlation with protein abundance (also see Fig 2B or Supplementary Fig S1A, sub-sequence l=48 at position i=18). For this analysis, we used a representative GFP expression dataset from Cambray *et al.* (2018). The reporter library consists of GFP fused in-frame with a library of 96-nt upstream sequences (N=14,425). The minimum free energy -30:30 shown was determined by Cambray *et al.* (right panel). **(B)** For *S. cerevisiae*, the opening energy -7:89 shows the strongest correlation with protein abundance (also see Supplementary Fig S1B, sub-sequence l=96 at position i= 89). For this analysis, we used the YFP expression dataset from Dvir *et al.* (2013). The YFP reporter library consists of 2,041 random decameric nucleotides inserted at the upstream of YFP start codon. The minimum free energy -15:50 was previously shown to correlate the best with protein abundance (right panel). **(C)** For *M. musculus*, the opening energy -8:11 shows the strongest correlation with protein abundance (also see Supplementary Fig S1C, sub-sequence l=19 at position i=11). For this analysis, we used the GFP expression dataset from Noderer *et al.* (2014). The GFP reporter library consists of 65,536 random hexameric and dimeric nucleotides inserted at the upstream and downstream of GFP start codon, respectively. The minimum free energy -30:30 was shown (right panel). See also Supplementary Table S1.  $R_s$ , Spearman's rho. Bonferroni adjusted P-values are below machine's underflow level for the correlations

830 between opening energies and protein abundances shown in the left panels.

831

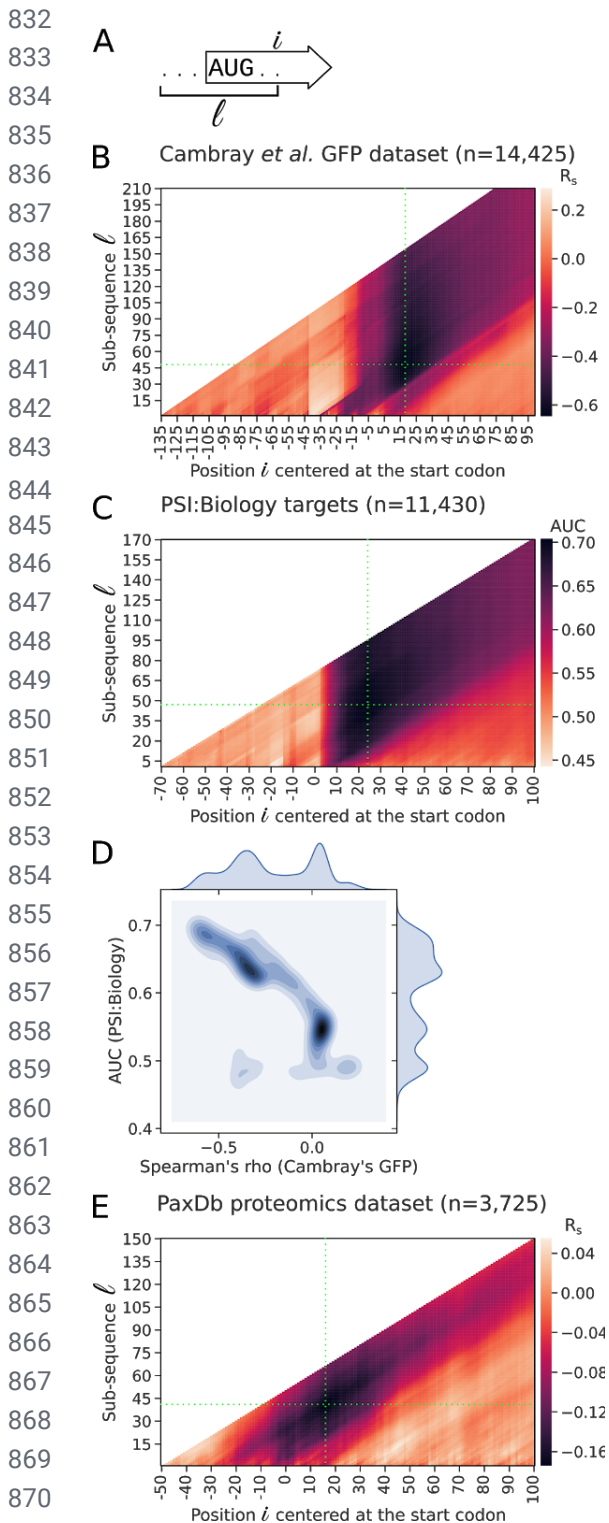

**Fig 2. Opening energies of regions surrounding the Shine-Dalgarno and start codons are predictive of protein expression in *E. coli*.** (A) Schematic representation of a transcript sub-sequence  $l$  at position  $i$  for the calculation of opening energy. For example, sub-sequence  $l=10$  at position  $i=10$  corresponds to the region 1:10. (B) Correlation between the opening energies for the sub-sequences of GFP transcripts and protein abundance. The opening energy at the region  $-30$  to  $18$  nt (sub-sequence  $l=48$  at position  $i=18$ , green crosshair) shows the strongest correlation with protein abundance [ $R_s=-0.65$ ;  $N=14,425$ , GFP expression dataset of Cambray et al. (2018)]. For this dataset, the reporter plasmid used is pGC4750, in which the promoter and ribosomal binding site are oFAB1806 inducible promoter and oFAB1173/BCD7, respectively. (C) Prediction accuracy of the expression outcomes of the PSI:BiologY targets using opening energy ( $N=11,430$ ). The opening energy at the region  $-23:24$  (sub-sequence  $l=47$  at position  $i=24$ , green crosshair) shows the highest prediction accuracy score (AUC=0.70). For this dataset, the expression vector used is pET21\_NESG, in which the promoter and fusion tag are T7lac and C-terminal His tag, respectively. (D) Comparison between the correlations and AUC scores by sub-sequence region taken from the above analyses. The sub-sequence regions that have strong correlations are likely to have high AUC scores, whereas the sub-sequence regions that have no correlations are likely not useful in prediction of the expression outcomes. (E) Correlation between the opening energies for the sub-sequences of *E. coli* transcripts and protein abundance. The transcripts used for this analysis are protein-coding sequences concatenated with 50 and 10 nt located upstream and downstream, respectively. The opening energy at the region  $-25:16$  (sub-sequence  $l=41$  at position  $i=16$ , green crosshair) shows the strongest correlation with protein abundance ( $R_s=-0.17$ ;  $N=3,725$ , PaxDb integrated proteomics dataset). See also Supplementary Table S1.  $R_s$ ,

874 Spearman's rho.

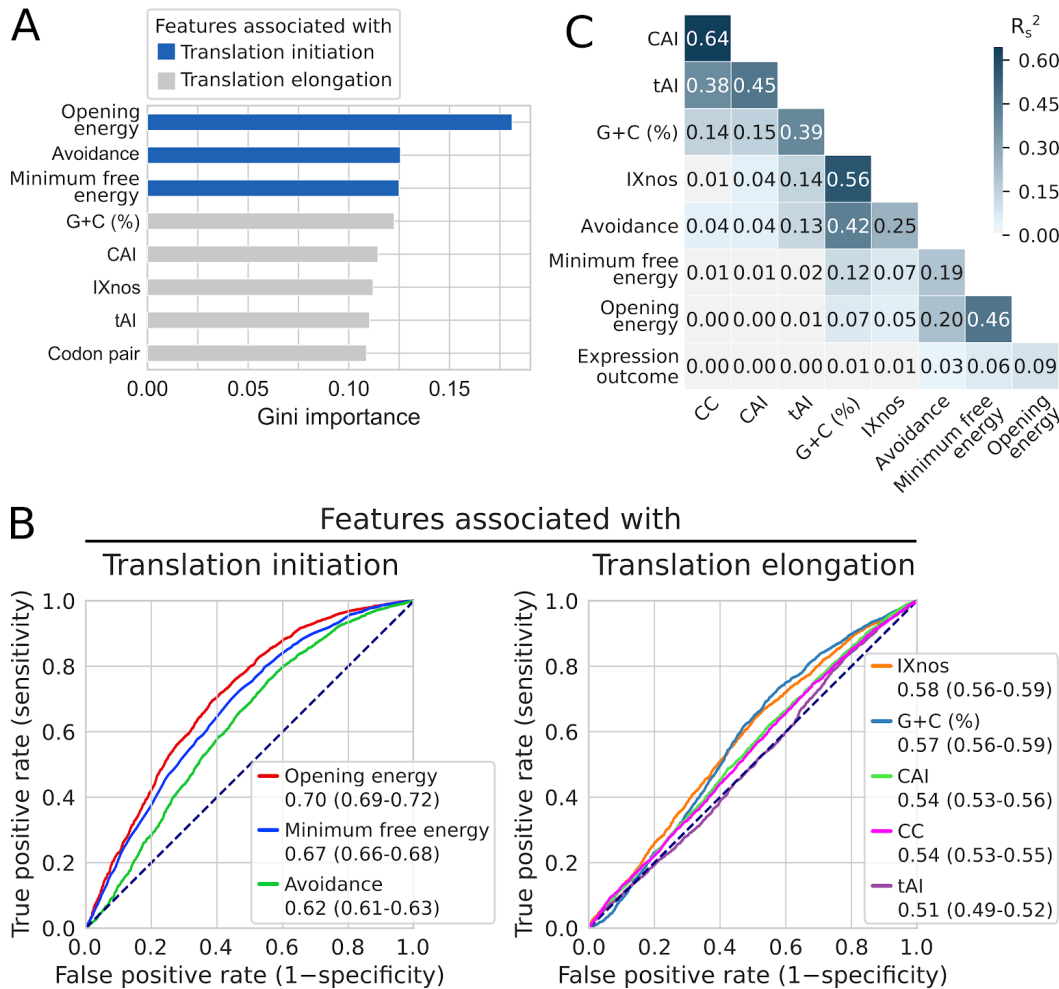

875

876

877 **Fig 3. Accessibility of translation initiation sites is the strongest predictor of**  
 878 **heterologous protein expression in *E. coli*.** (A) mRNA features ranked by Gini importance for  
 879 random forest classification of the expression outcomes of the PSI:BiologY targets (N=8,780 and  
 880 2,650, 'success' and 'failure' groups, respectively). The features associated with translation  
 881 initiation rate (purple; opening energy -24:24, minimum free energy -30:30, and mRNA:ncRNA  
 882 avoidance 1:30) have higher scores than the feature associated with translation elongation rate  
 883 [blue; tRNA adaptation index (tAI), codon context (CC), codon adaptation index (CAI), G+C  
 884 content (%), and IXnos]. The IXnos scores are translation elongation rates predicted using a  
 885 neural network model trained with ribosome profiling data (Supplementary Fig S3). (B) ROC  
 886 analysis shows that accessibility (opening energy -24:24) has the highest classification  
 887 accuracy. The AUC scores with 95% confidence intervals are shown. See also Supplementary  
 888 Table S1. (C) Accessibility (opening energy -24:24) is the best feature in explaining the  
 889 expression outcomes. Relationships between the features and expression outcomes  
 890 represented as squared Spearman's rho ( $R_s^2$ ).

891

892

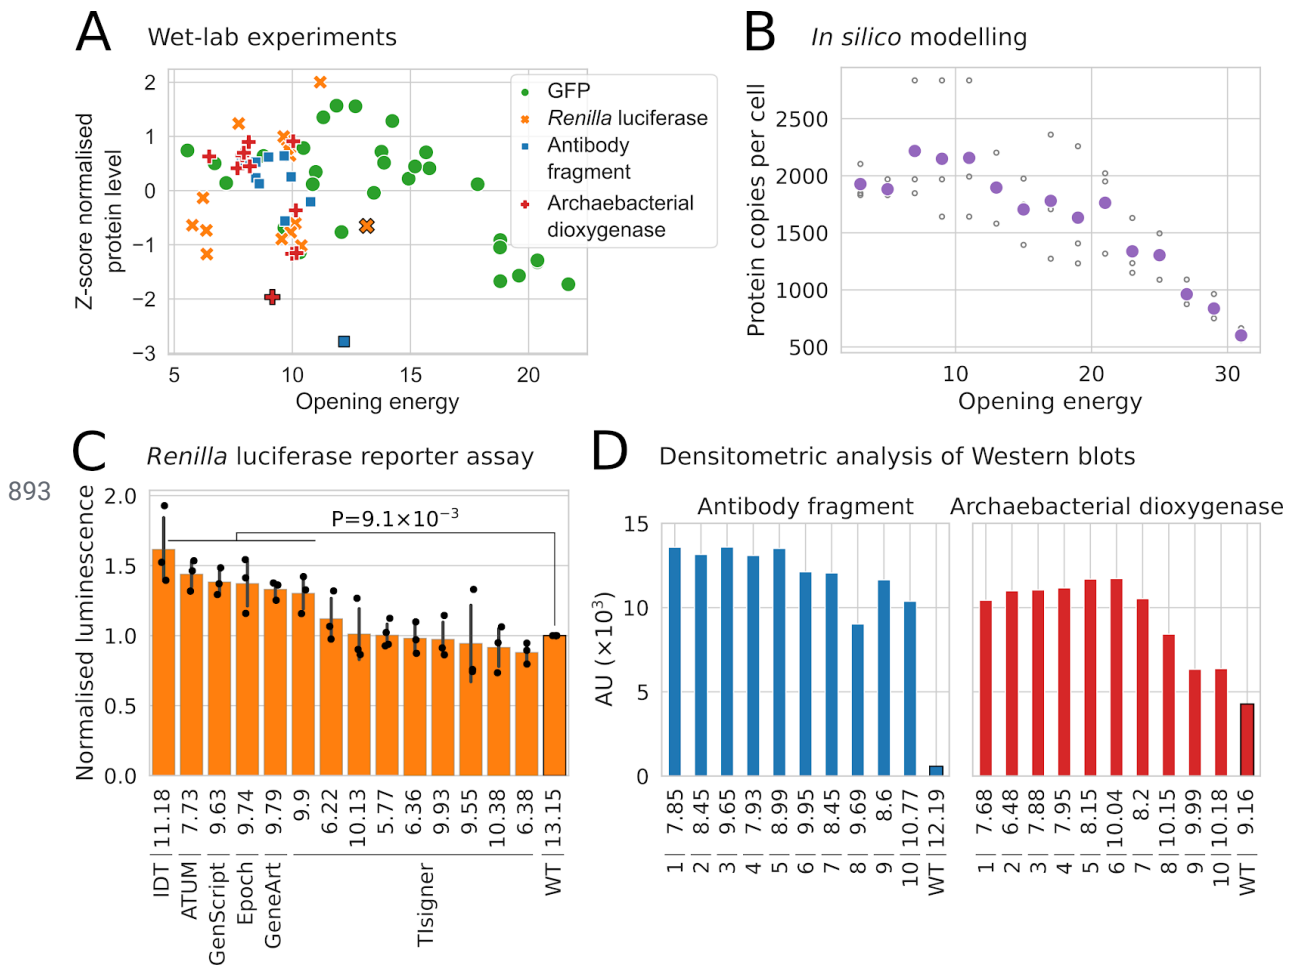

912 blots shows that the yields of an antibody fragment and an archaeobacterial dioxygenase can be  
913 improved by synonymous codon changes within the first six codons (Voges et al., 2004). A RTS  
914 *E. coli* cell-free expression system was used. The processed data are available Supplementary  
915 Table S2. AU, arbitrary unit;  $R_s$ , Spearman's rho; WT, wild-type.
